# Supplementary material for: Lomasomes and Other Fungal Plasma Membrane Macroinvaginations Have a Tubular and Lamellar Genesis
Source: J Fungi (Basel). 2022 Dec 19;8(12):1316. doi: 10.3390/jof8121316 (PMC9781077; doi:10.3390/jof8121316)
Supplement: Supplementary file 1 [file jof-08-01316-s001.zip]

Archive with 39 entries (39 files):
- Video_S26.avi
- Video_S27.avi
- Video_S28.avi
- Video_S29.avi
- Video_S30.avi
- Video_S31.avi
- Video_S32.avi
- Video_S33.avi
- Video_S34.avi
- Video_S35.avi
- Video_S36.avi
- Video_S37.avi
- Video_S38.avi
- Video_S1.avi
- Video_S2.avi
- Video_S3.avi
- Video_S4.avi
- Video_S5.avi
- Video_S6.avi
- Video_S7.avi
- Video_S8.avi
- Video_S9.avi
- Video_S10.avi
- Video_S11.avi
- Video_S12.avi
- Video_S13.avi
- Video_S14.avi
- Video_S15.avi
- Video_S16.avi
- Video_S17.avi
- Video_S18.avi
- Video_S19.avi
- Video_S20.avi
- Video_S21.avi
- Video_S22.avi
- Video_S23.avi
- Video_S24.avi
- Video_S25.avi
- Supplementary_Video_captions.pdf
